# Supplementary material
Source: PubMed Central journal article supplement (PMC8026744)

REVIGO Gene Ontology treemap

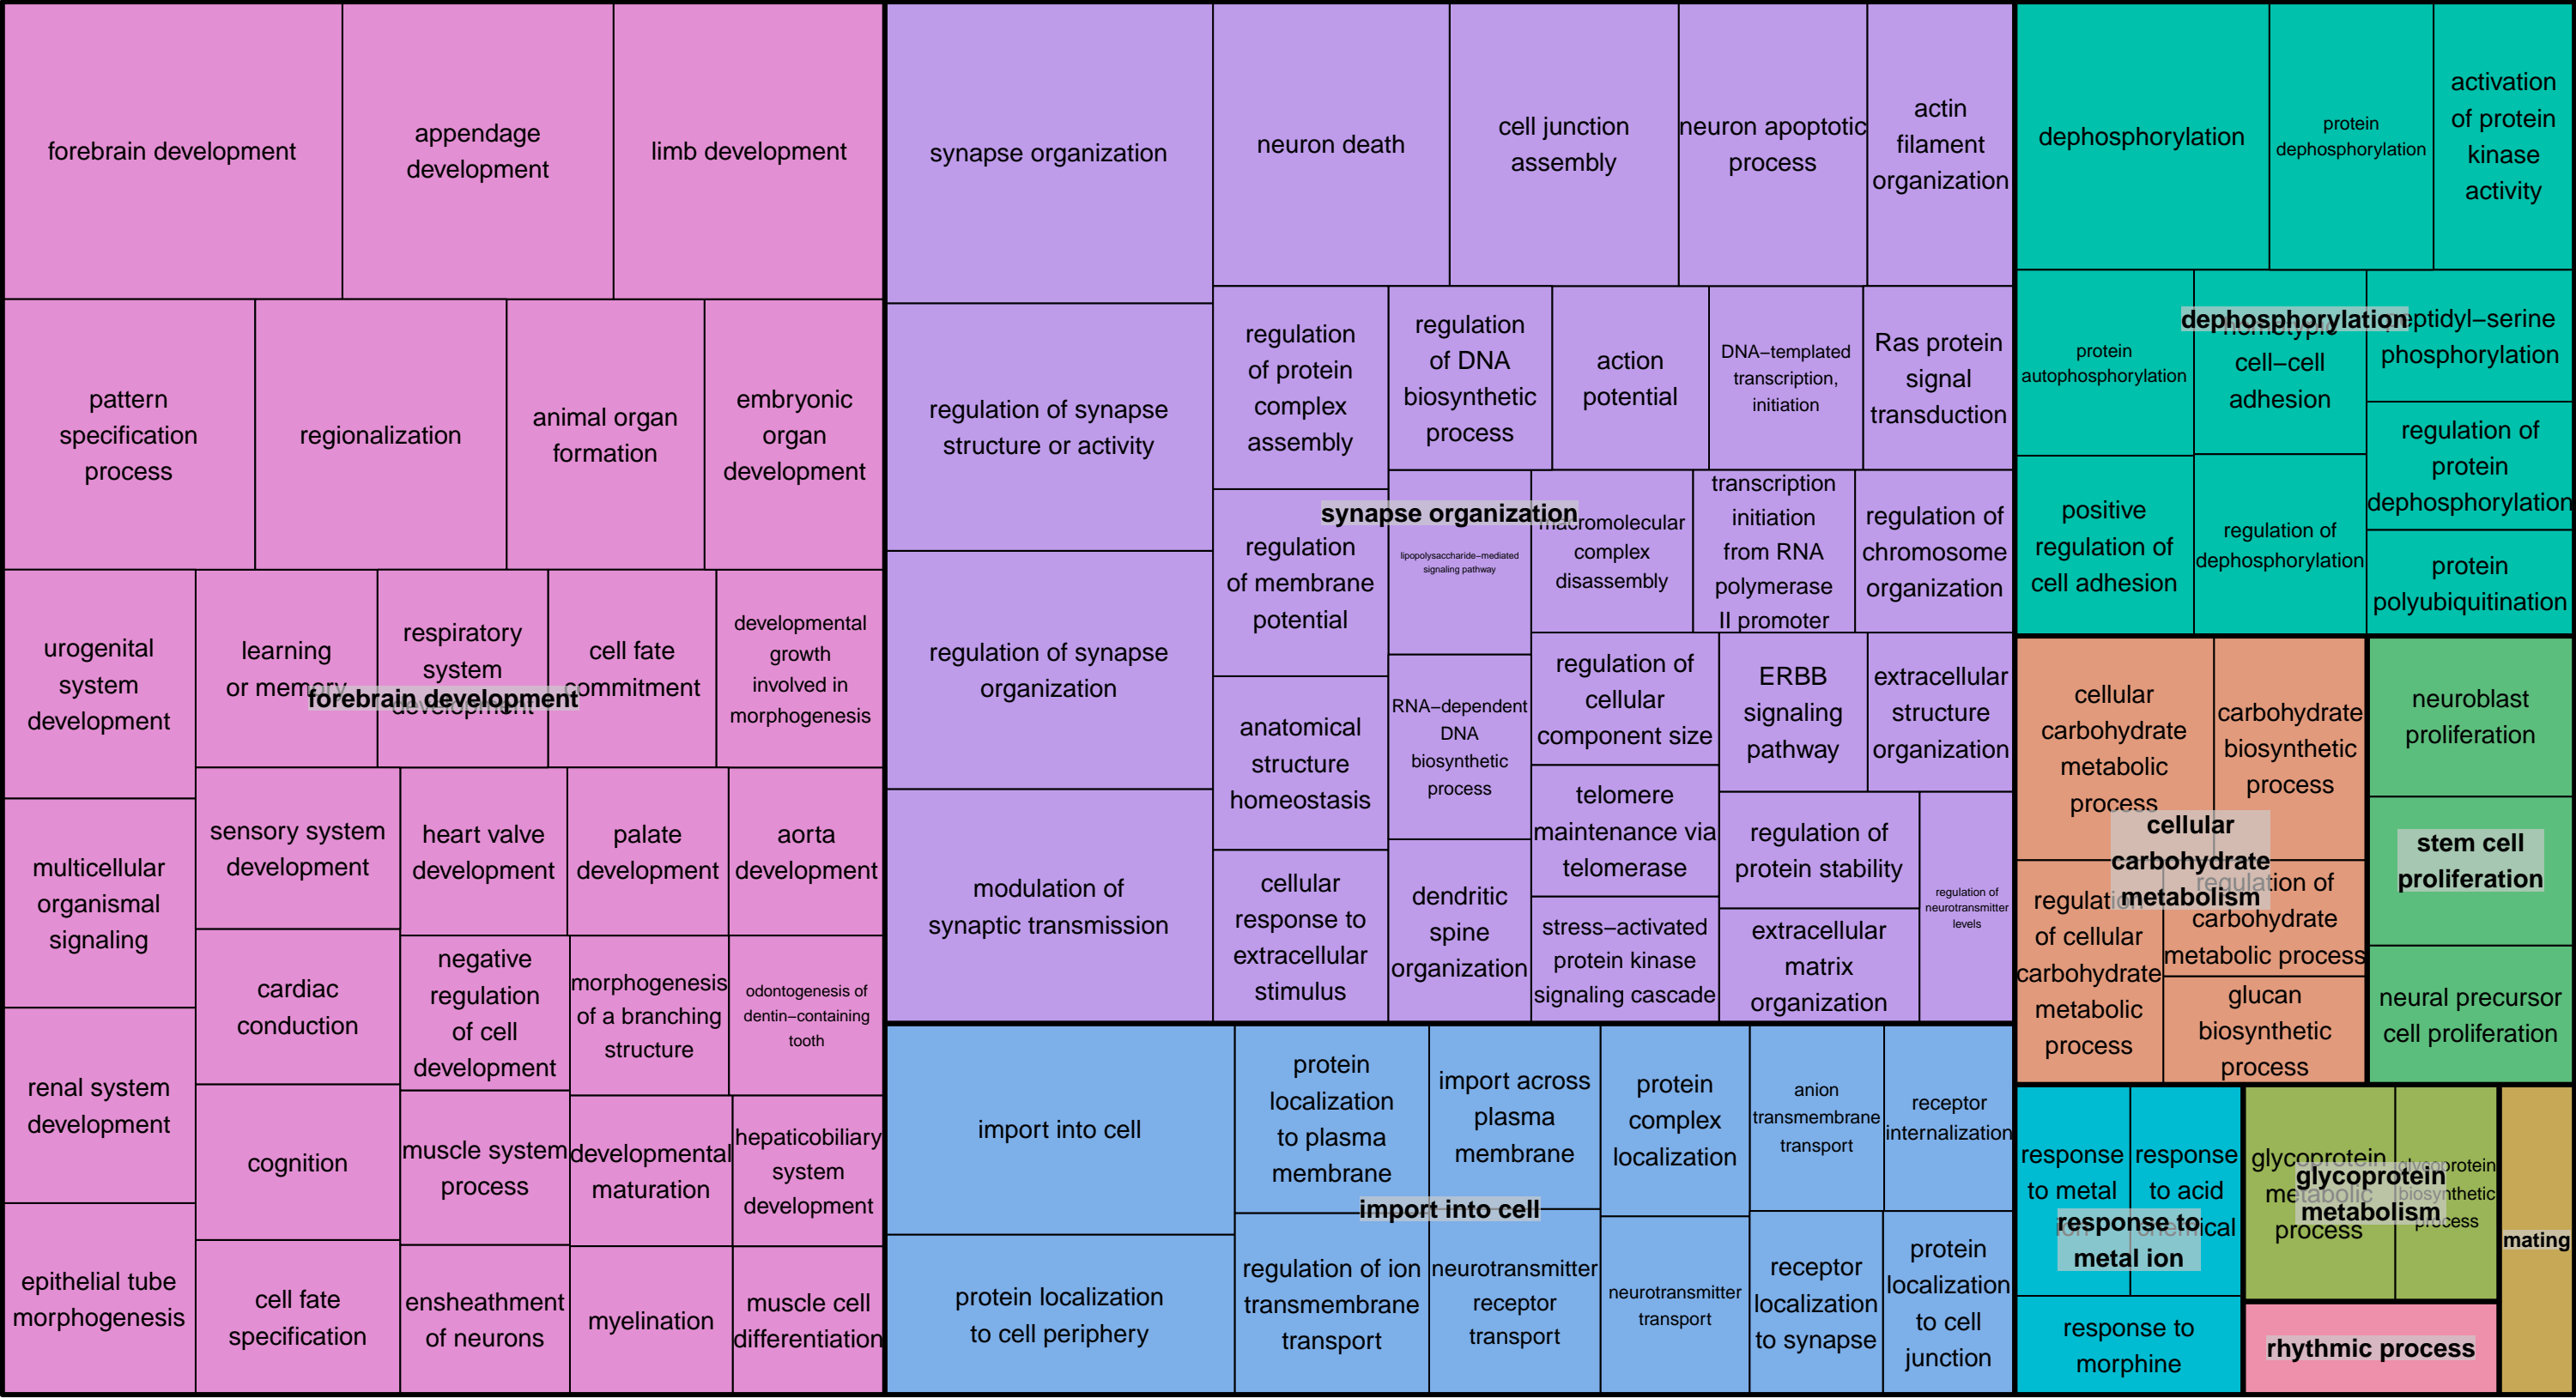

Supplement: NIHMS1680437-supplement-1.pdf [file NIHMS1680437-supplement-1.pdf]

REVIGO Gene Ontology treemap

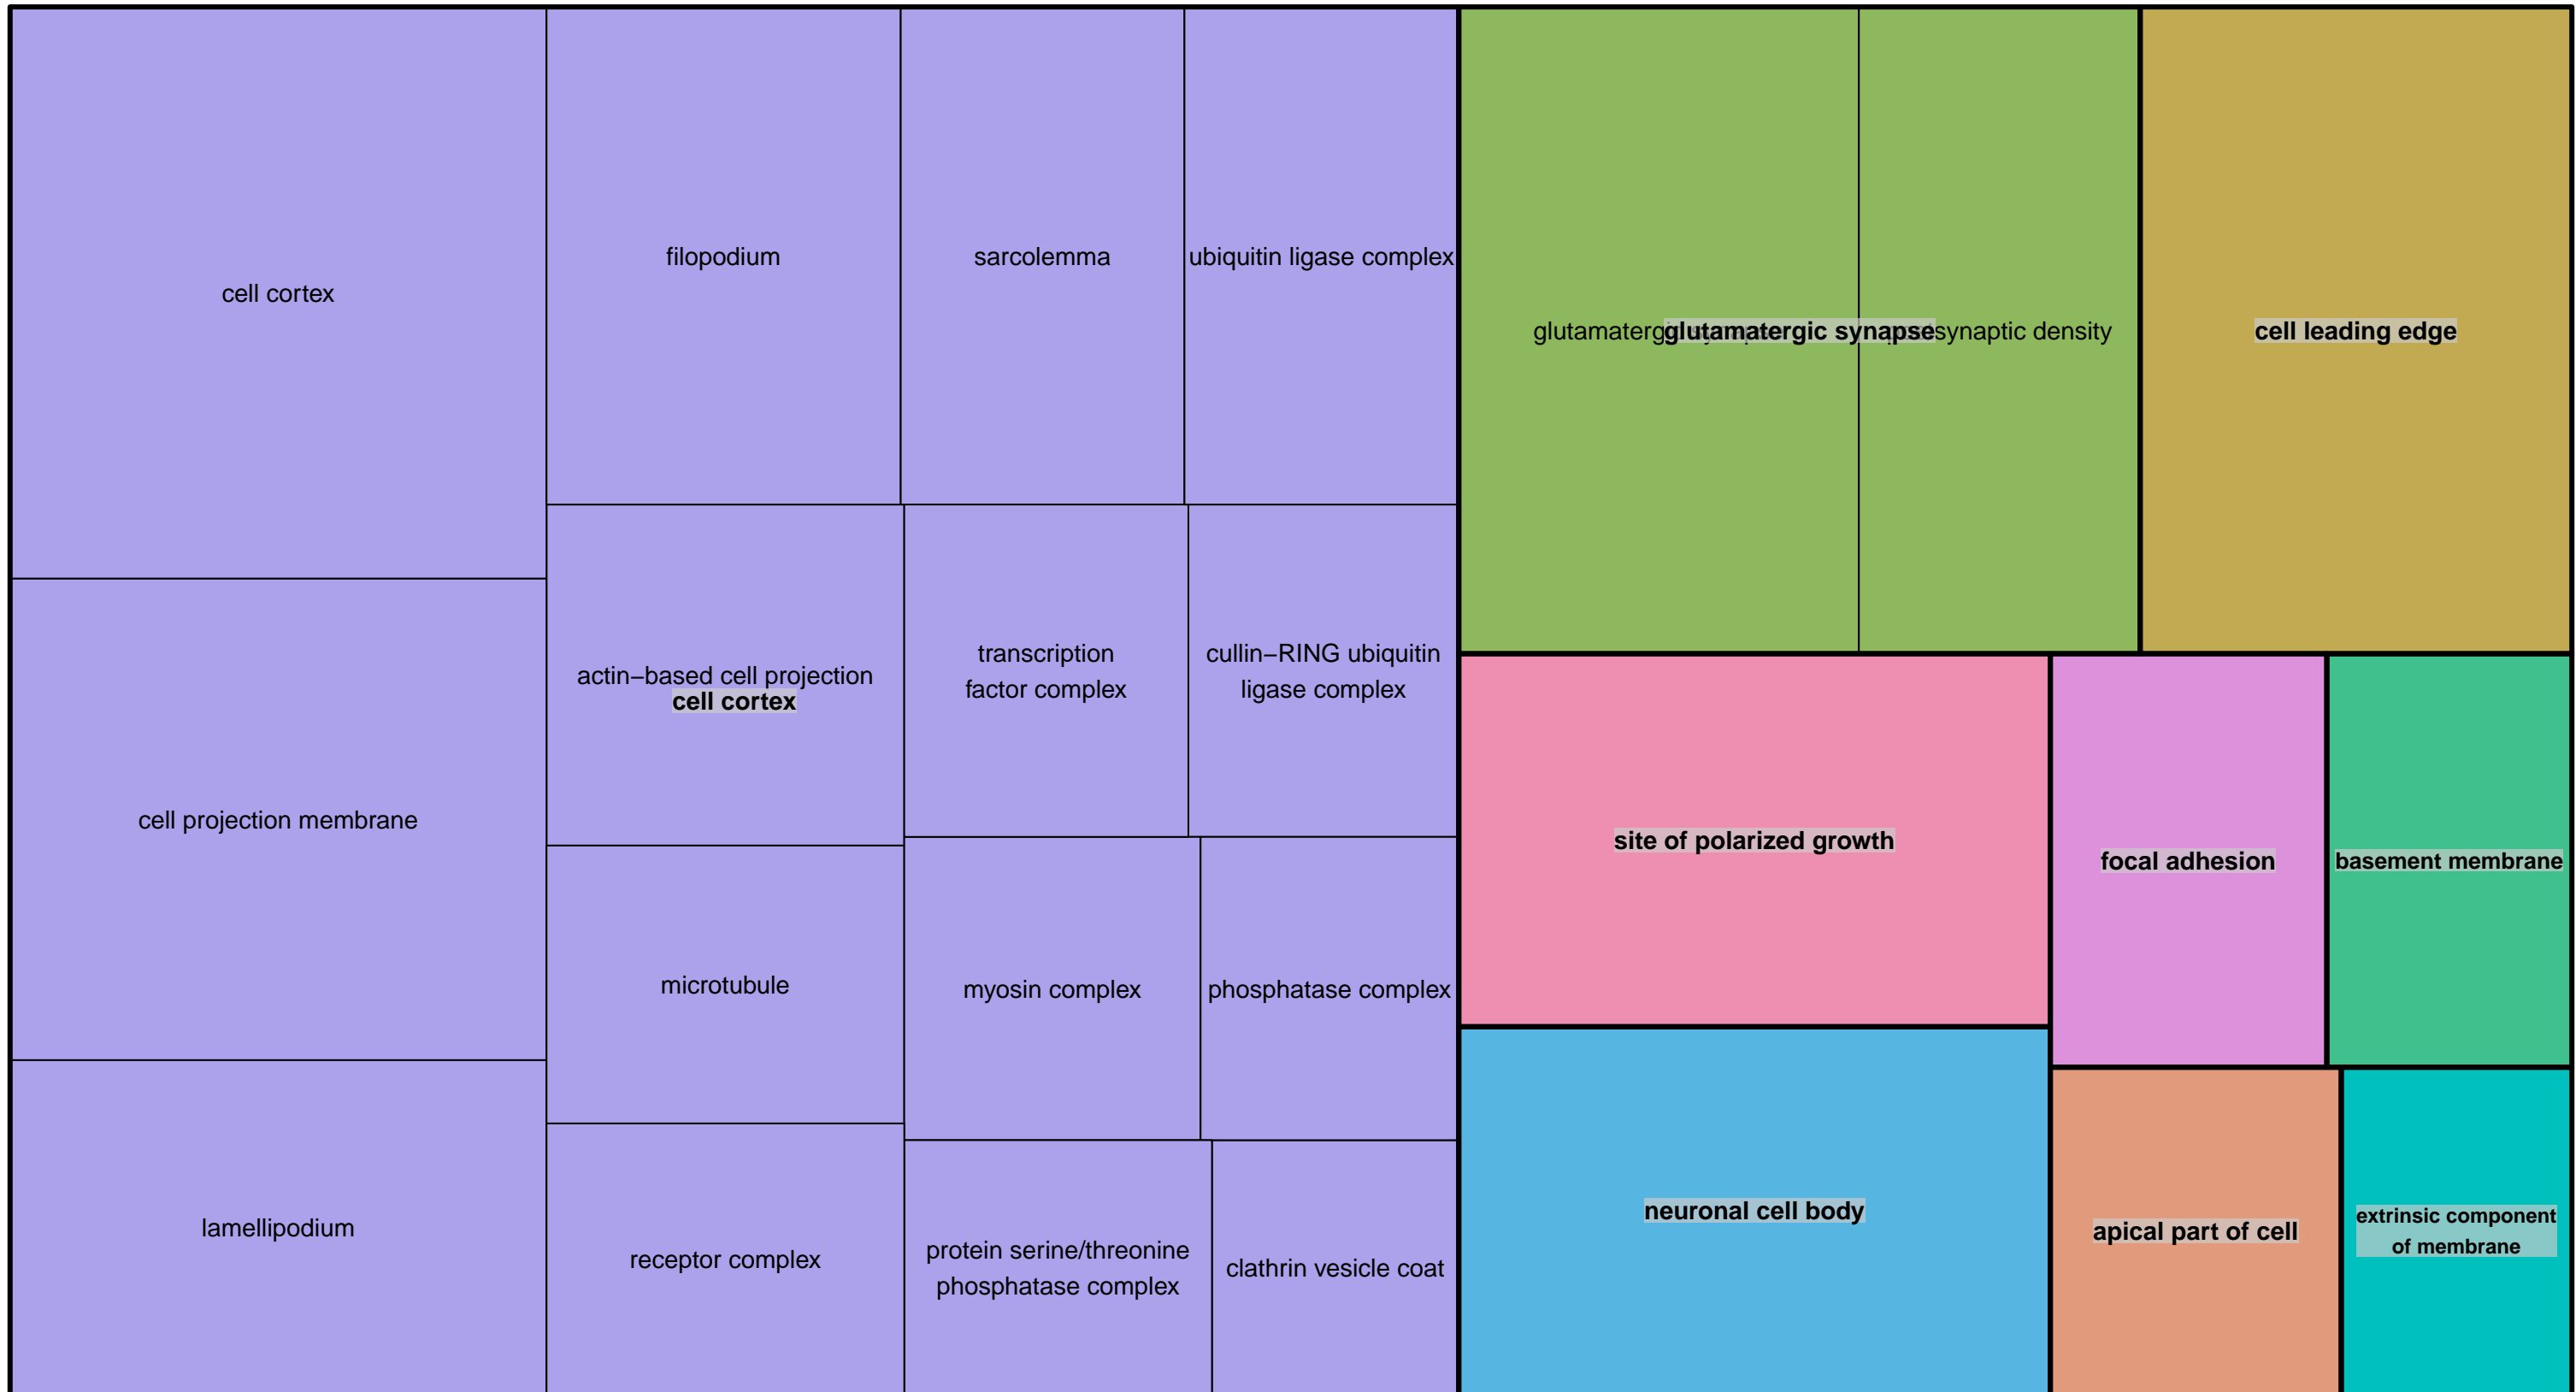

Supplement: NIHMS1680437-supplement-2.pdf [file NIHMS1680437-supplement-2.pdf]

REVIGO Gene Ontology treemap

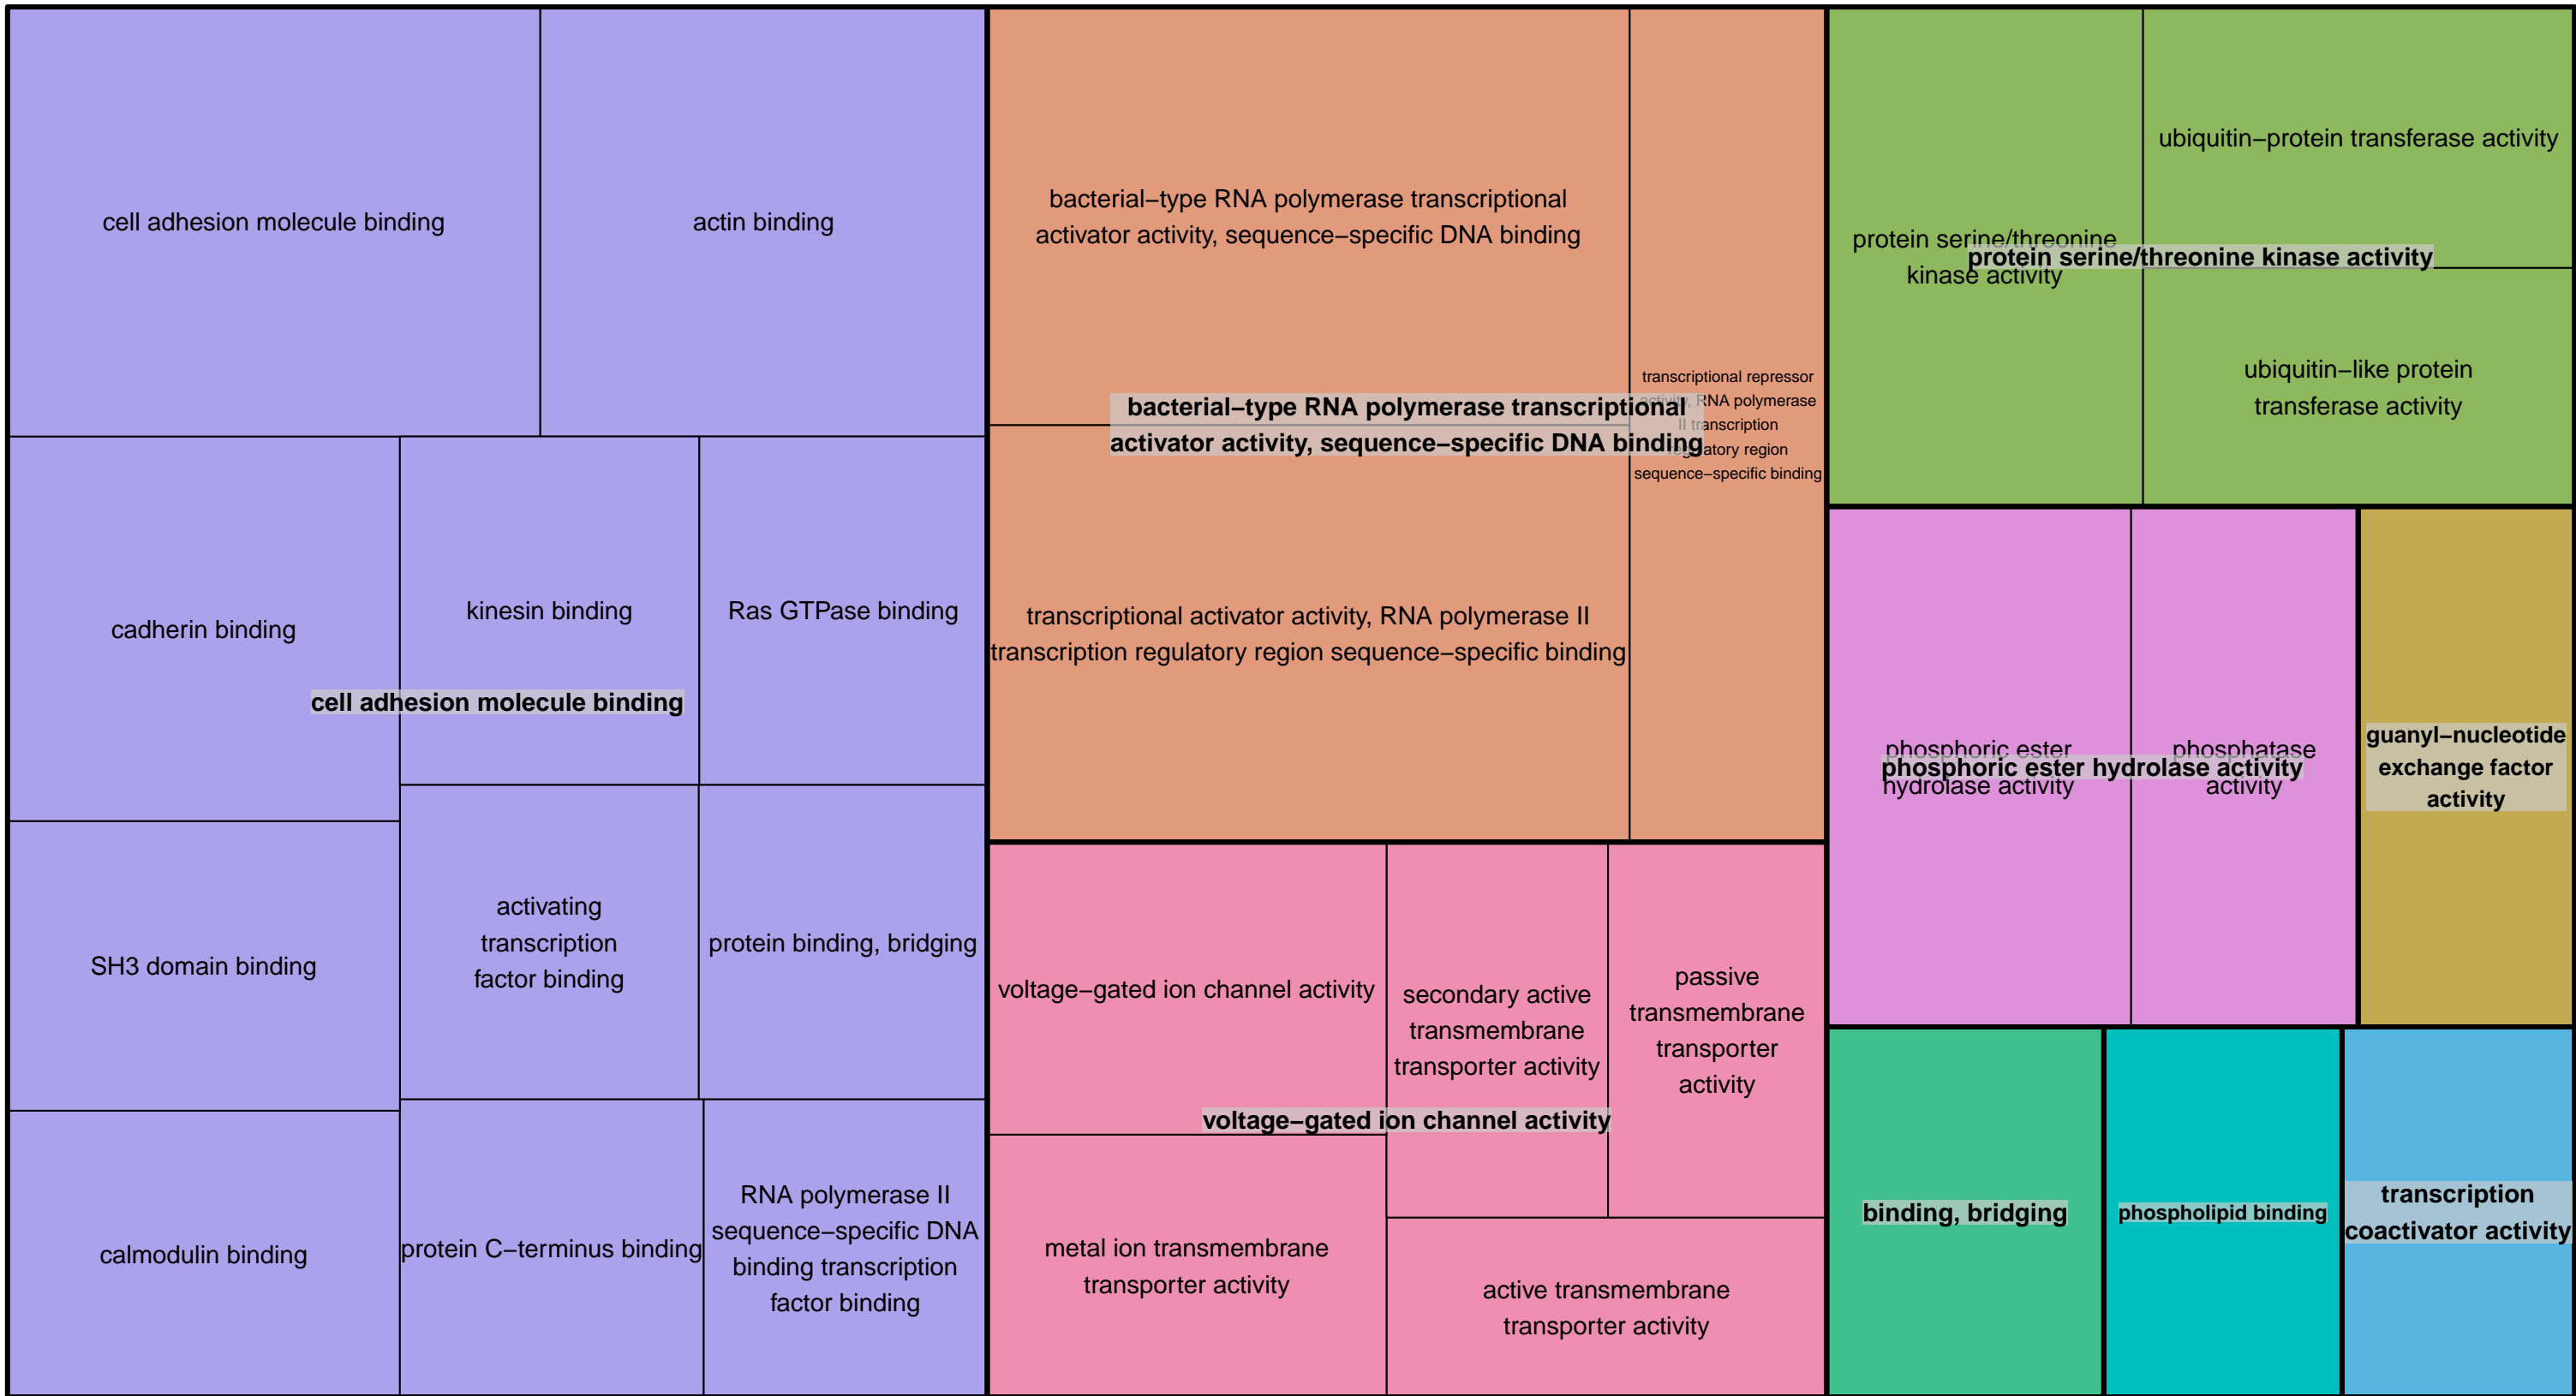

Supplement: NIHMS1680437-supplement-3.pdf [file NIHMS1680437-supplement-3.pdf]
